# Supplementary material
Source: PubMed Central journal article supplement (PMC4213160)
Supplement: supp_tpc.114.129767_tpc129767_SupplementalRev.pdf [file supp_tpc.114.129767_tpc129767_SupplementalRev.pdf]

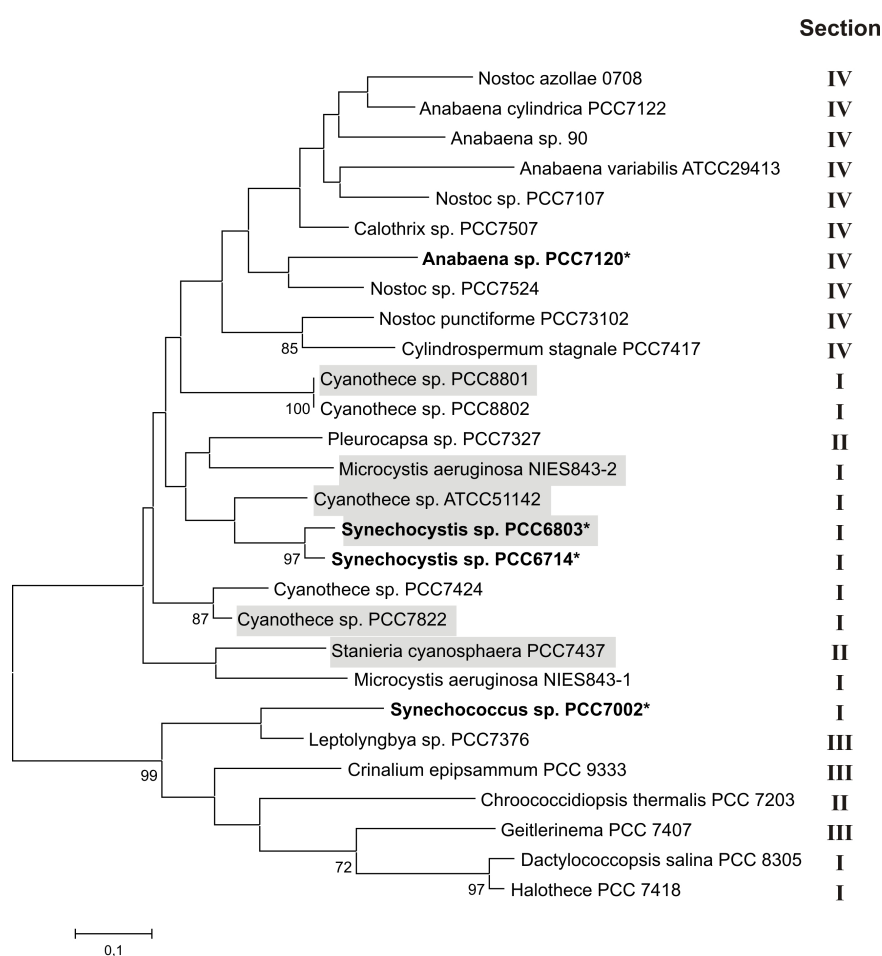

**Supplemental Figure 1.**

Visualization of the sequence relatedness among 28 PsrR1 homologs in an unrooted neighbor-joining phylogenetic tree. Roman numerals indicate the cyanobacterial sections [3] to which the respective strain belongs to. The organisms chosen for the CopraRNA prediction are highlighted by a grey box, those for which transcriptome data have confirmed the presence of PsrR1, are in boldface letters and labelled by an asterisk. The optimal tree with the sum of branch length = 4.9822 is shown. The percentage of replicate trees in which the associated taxa clustered together in the bootstrap test (1000 replicates) are shown next to the branches when  $\geq 70\%$ . The tree is drawn to scale, with branch lengths in the same units as those of the evolutionary distances used to infer the phylogenetic tree. The evolutionary distances were computed using the Maximum Composite Likelihood method and are in the units of the number of base substitutions per site. There were a total of 121 positions in the final dataset. Evolutionary analyses were conducted in MEGA5 [4].

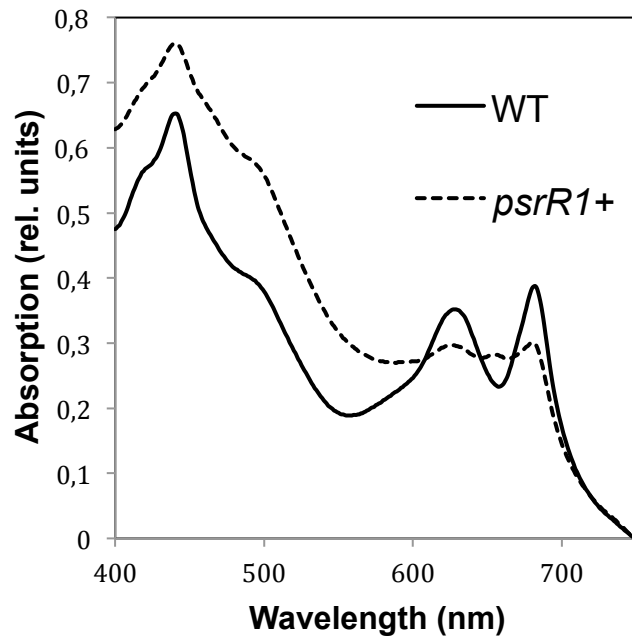

### Supplemental Figure 2.

Absorption spectrum of the *psrR1*<sup>+</sup> over-expressor strain. Whole cell absorption spectra of wild-type and *psrR1*<sup>+</sup> mutant strains after five days of copper depletion. Under these conditions the PsrR1 sRNA is highly induced due to overexpression using the *petJ* promoter, whereas the wild type does not show bleaching.

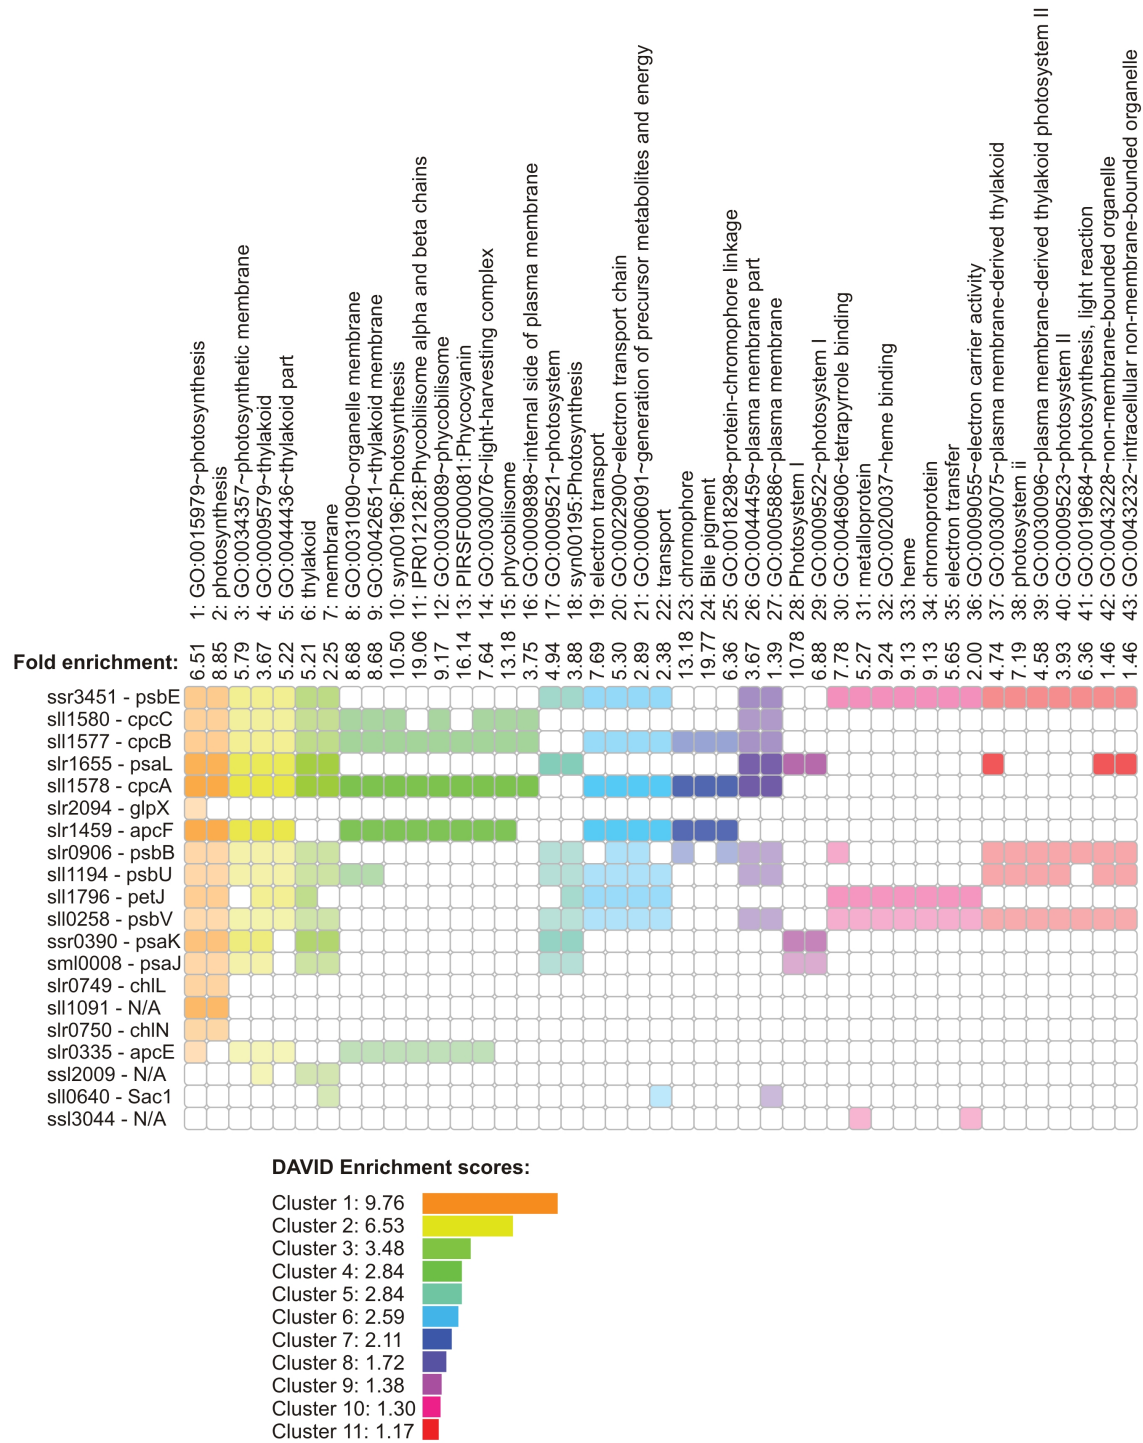

**Supplemental Figure 3.**

Figure legend see next page.

### Supplemental Figure 3.

Visualization of functional enrichment of the PsrR1 target prediction by the DAVID webserver [5] as provided by CopraRNA [6]. The 60 targets of the top 85 list of the comparative CopraRNA prediction which have homologs in *Synechocystis* sp. PCC 6803 have been subjected to functional enrichment. The figure shows all members of the 11 clusters with a DAVID enrichment score  $\geq 1$  in specific color. Each row represents a gene and each column a specific functional term. If the gene can be assigned to a term, the corresponding square is filled/colored. Closely related terms are assigned to a cluster and have the same color. The opacity of the color depends on the p-value of the CopraRNA prediction. A more intense color represents a more significant p-value. The "Fold enrichment" gives the enrichment of a term in the prediction group in relation to the whole genome background (e.g. the PsrR1 prediction contains 6.51 times more genes belonging to the term "GO:0015979~photosynthesis" than the background). The enrichment scores give a measure of the biological significance of the cluster. The DAVID enrichment score for a cluster is the log transformed geometric mean of all enrichment p-values from the terms belonging to the respective cluster. A higher score represents a more statistically significant enrichment. The individual p-values for the terms are calculated by a modified Fisher's exact test. The length of the bars next to the groups of enriched genes corresponds to the size of the enrichment score. The publication on the DAVID webserver suggests to investigate clusters with an enrichment score of  $\geq 1.3$  [5].

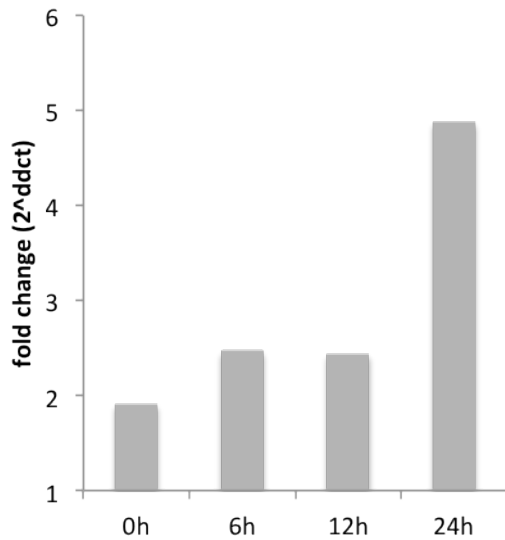

**Supplemental Figure 4.**

Induction pattern of PsrR1 under control of the *petJ* promoter in the *psrR1*<sup>+</sup> strain upon copper depletion. PsrR1 abundance was quantified in *psrR1*<sup>+</sup> and wild-type cell by qRT-PCR analysis using *rnpB* as an internal control. The amount of PsrR1 is expressed as a fold change relative to its level in the wild type under the same growth conditions.



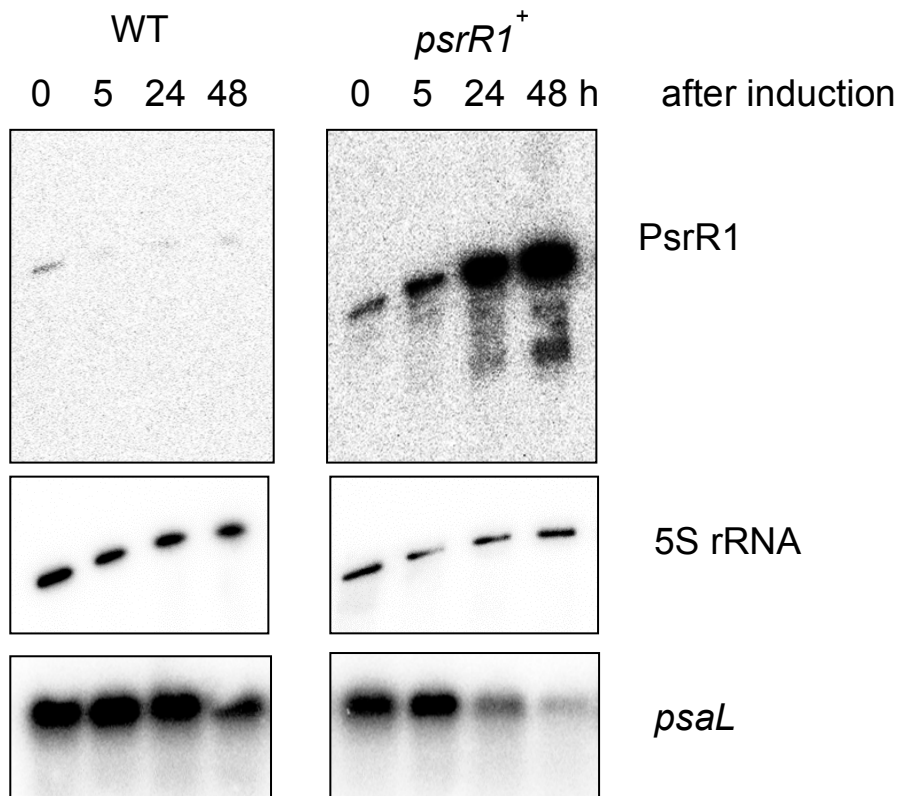

**Supplemental Figure 6.**

Verification of the PsrR1 impact on *psaL* expression in cyanobacteria. The RNA gel blot hybridization shows the level of *psaL* mRNA after over-expression of PsrR1 in comparison to the wild-type control. *Synechocystis* sp. PCC 6803 cells were subjected to copper step down during exponential growth phase. Immediately before (0 h), as well as after 5, 24 and hours of copper depletion, cultures were sampled for analysis of PsrR1 and *psaL* mRNA accumulation. 5S rRNA served as loading control.

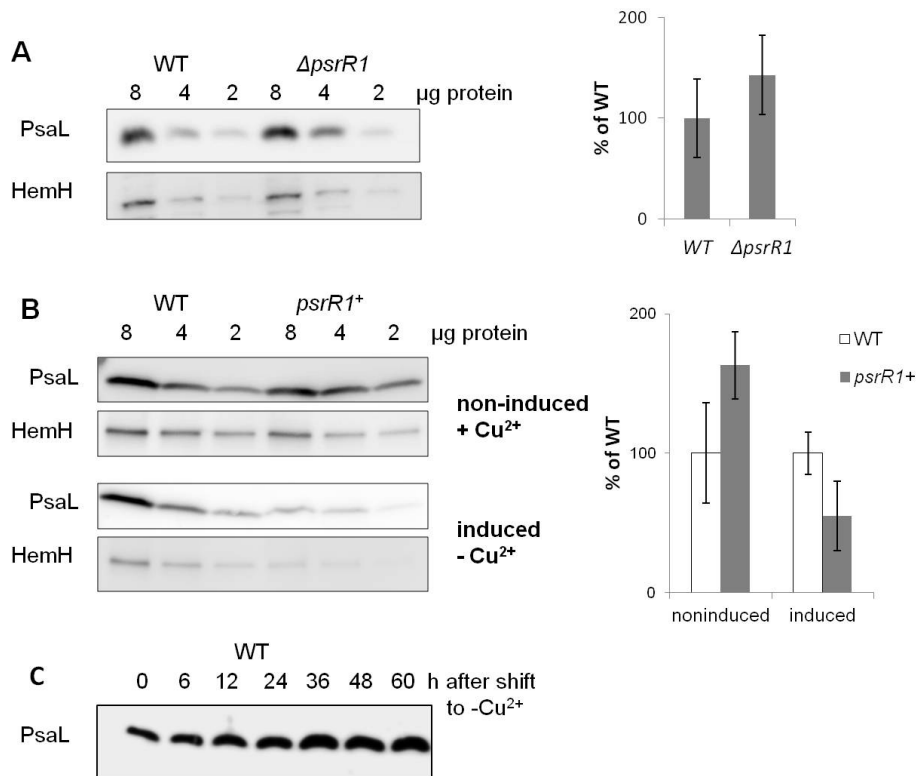

### Supplemental Figure 7.

Western Blot analysis of wild-type (WT),  $\Delta psrR1$  and  $psrR1^+$  cell extracts using PsaL and HemH antisera. **(A)** WT and  $\Delta psrR1$  mutant strains were grown in standard BG-11 medium under moderate light conditions. Different amounts of protein extracts were separated by SDS-PAGE and the level of PsaL protein was quantified based on the gel blot image by Fusion-SL4 and the Fusion-Capt Advance software (Peqlab) and normalized with the HemH immunosignal. Samples corresponding to 100, 50 and 25 % of the protein loading were analyzed.

**(B)** WT and  $psrR1^+$  mutant strains were grown in medium containing 5  $\mu$ M CuSO<sub>4</sub> (non-induced), washed and incubated for 48 h in copper-free medium for induction of  $psrR1^+$  (induced). Different amounts of protein extracts were separated in a pre-casted gradient SDS-PAGE gel (Biorad) and the level of PsaL protein was quantified based on the gel blot image by Fusion-SL4 and the Fusion-Capt Advance software (Peqlab) and normalized with the HemH immunosignal. Samples corresponding to 100, 50 and 25 % of the protein loading were analyzed.

**(C)** WT cells were grown in BG-11 medium containing 5  $\mu$ M CuSO<sub>4</sub> (time point 0), washed and further grown in BG-11 medium lacking CuSO<sub>4</sub> for up to 60 h. 5  $\mu$ g of protein were loaded per lane.



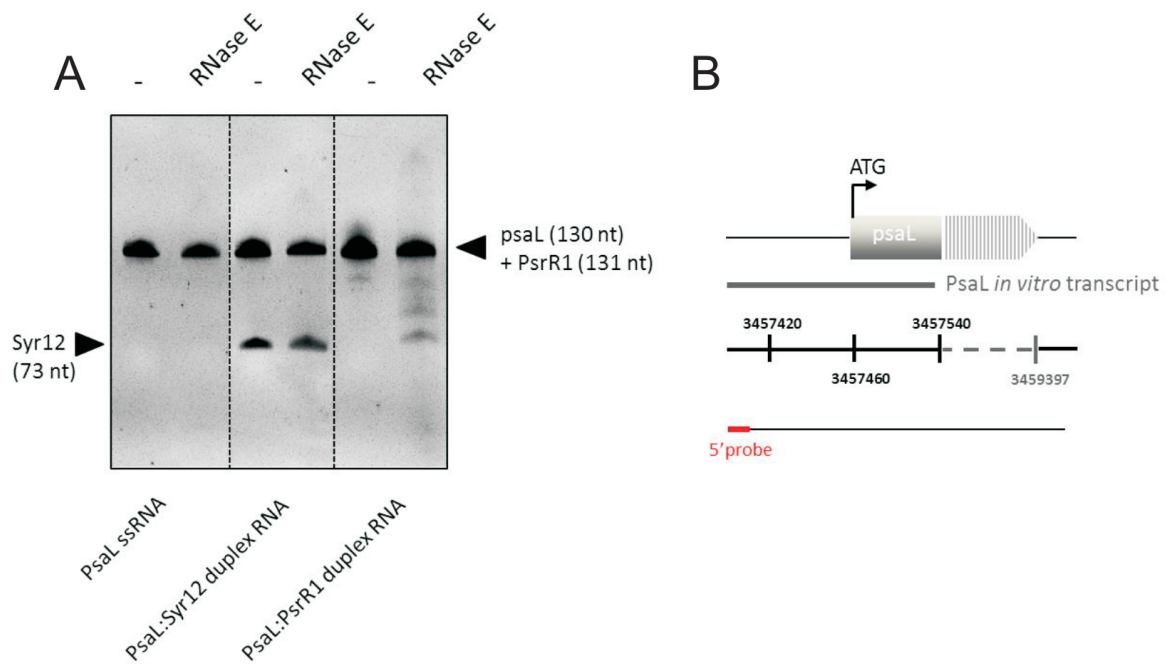

### Supplemental Figure 8.

PsrR1 dependent processing of *psaL* by RNase E. (A) Ethidium bromide stained 8M urea 10% PAA gel of *in vitro* transcribed single-stranded *psaL* RNA (left panel), duplex *psaL* RNA:SyR12 (middle panel) and duplex *psaL* RNA:PsrR1 (right panel), incubated without (-) and with (+) recombinant PCC 6803 RNase E, respectively. PsrR1 and *psaL* have similar sizes and run in one band. (B) Scheme of the *psaL in vitro* transcript and the location of the oligonucleotide probe.

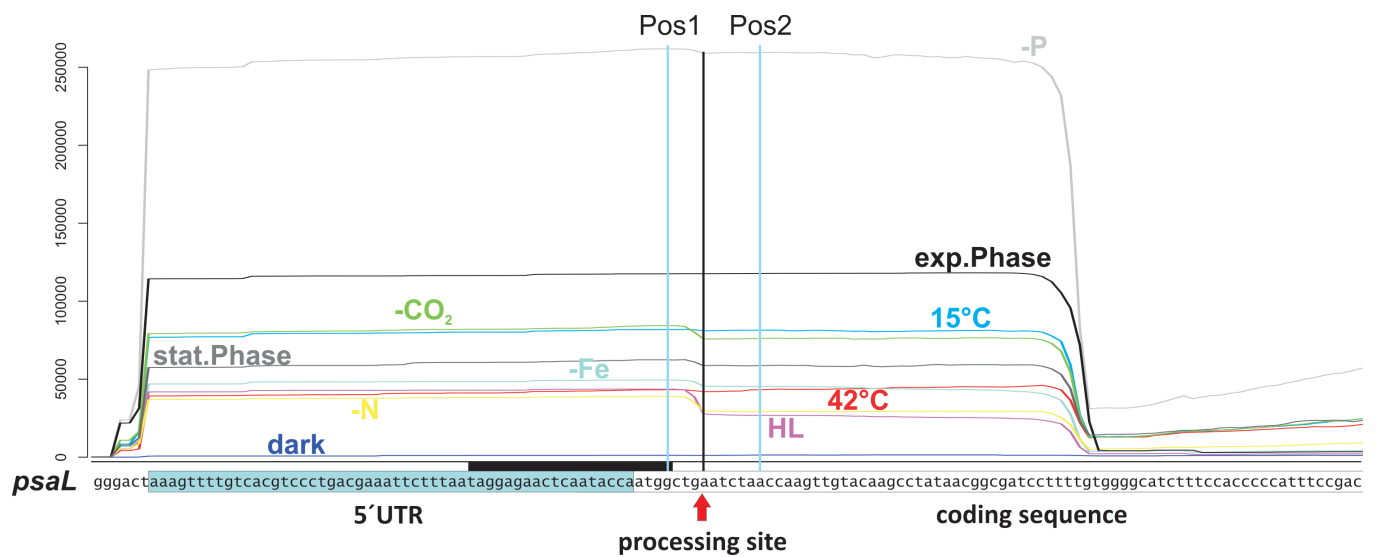

### Supplemental Figure 9.

Normalized Solexa transcriptome sequencing reads for the *psaL* 5' region for all 10 conditions investigated in [7]. Conditions as described in [7]: Phosphate limitation (-P, grey, cells washed with phosphate free BG11, 12h cultivation), exponential phase (exp. Phase, black,  $OD_{750} = \sim 0.6-0.8$ ,  $50 - 80 \mu\text{mol photons m}^{-2}\text{s}^{-1}$ ),  $\text{CO}_2$  depletion (- $\text{CO}_2$ , green, cells washed with  $\text{CO}_2$  free medium), cold stress ( $15^\circ\text{C}$ , blue, 30 min  $15^\circ\text{C}$ ), stationary phase (stat. Phase, grey,  $OD_{750} = 4.7$ ), iron stress (-Fe, cyan, iron was chelated with DFB), heat stress ( $42^\circ\text{C}$ , red, cells were incubated for 30 min at  $42^\circ\text{C}$ ), nitrogen depletion (-N, yellow, cells were washed in nitrogen free BG11, 12h cultivation), high light stress (HL, purple, cells were exposed  $470 \mu\text{mol photons m}^{-2}\text{s}^{-1}$  for 30 min), dark induction (dark, dark blue, no light for 12h). The 5'UTR of *psaL* and the interaction site with PsrR1 is indicated. Sequence coverage in the e.g. HL or -N data show a sharp drop, which indicates the processing site, and is marked by a red arrow and a black vertical line. As a measure for the amount of processed 5' fragment we compare the read coverage from a nucleotide position 5' of the processing site with the read coverage from a nucleotide position 3' of the processing site (Pos1 and Pos2).

**Supplemental Table 1.** Combined List of mRNAs and 5'UTRs Significantly Affected by PsrR1 Overexpression.

| Locus tag            | Gene         | Description                                    | MA <sup>b</sup> |      | CoproRNA <sup>b</sup> |       |
|----------------------|--------------|------------------------------------------------|-----------------|------|-----------------------|-------|
|                      |              |                                                | PsrR1-WT        | R    | p-Value               | E     |
| sll1578              | <i>cpcA</i>  | phycocyanin alpha subunit                      | 0.11            | 1    | 1.5E-05               | -14.4 |
| slr1459              | <i>apcF</i>  | phycobilisome core component                   | 0.02            | 2    | 2.0E-05               | -10.8 |
| slr1655              | <i>psaL</i>  | PSI subunit XI ( <i>psaL-psaI</i> operon)      | <b>-0.82</b>    | 3    | 3.8E-05               | -24.3 |
| sll1091              | <i>chlP</i>  | geranylgeranyl reductase                       | 0.24            | 4    | 1.3E-04               | -9.5  |
| sll1995              |              | family 2 glycosyl transferase                  | -0.14           | 5    | 2.8E-04               | -13.2 |
| ssr0390              | <i>psaK1</i> | PSI subunit X1                                 | <b>-1.37</b>    | 6    | 3.4E-04               | -15.5 |
| slr0610              | <i>evrC</i>  | ethyl viologen export system permease          | -0.12           | 7    | 3.7E-04               | -10.6 |
| slr1808              | <i>hemA</i>  | glutamyl-tRNA reductase                        | 0.14            | 8    | 4.6E-04               | -11.9 |
| sll1138              |              | haloacid dehalogenase superfamily protein      | -0.11           | 9    | 7.1E-04               | -11.4 |
| sll0374              | <i>urtE</i>  | urea transport system ATP-binding protein      | -0.16           | 10   | 9.8E-04               | -11.8 |
| ssr3451              | <i>psbE</i>  | PSII cytochrome b559 subunit alpha             | -0.28           | 12   | 1.1E-03               | -16.5 |
| sll0634              | <i>btpA</i>  | PSI biogenesis protein                         | -0.11           | 13   | 1.2E-03               | -17.4 |
| sll1577              | <i>cpcB</i>  | phycocyanin beta subunit                       | 0.44            | 14   | 1.6E-03               | -14.0 |
| sll1796              | <i>petJ</i>  | cytochrome c-553                               | <b>-1.17</b>    | 15   | 1.7E-03               | -12.0 |
| sll0109              | <i>aroH</i>  | chorismate mutase                              | 0.04            | 17   | 2.2E-03               | -15.5 |
| sll1580              | <i>cpcC1</i> | phycobilisome rod linker polypeptide Lr        | 0.07            | 18   | 2.4E-03               | -9.3  |
| slr0749              | <i>chlL</i>  | protochlorophyllide reductase                  | -0.15           | 24   | 3.7E-03               | -22.4 |
| slr0750              | <i>chlN</i>  | protochlorophyllide reductase                  | -0.25           | 34   | 5.1E-03               | -11.8 |
| sll1194              | <i>psbU</i>  | PSII 12 kD extrinsic protein                   | 0.37            | 37   | 5.8E-03               | -7.9  |
| slr0906              | <i>psbB</i>  | PSII CP47 protein                              | 0.25            | 38   | 5.9E-03               | -9.6  |
| sml0008              | <i>psaJ</i>  | PSI reaction center subunit IX                 | -0.56           | 41   | 6.0E-03               | -12.7 |
| sll0258              | <i>psbV</i>  | PSII cytochrome c550                           | -0.20           | 50   | 7.6E-03               | -9.3  |
| ssl3044              |              | hydrogenase subunit                            | -0.53           | 63   | 1.2E-02               | -8.5  |
| ssl2009              |              | thylakoid membrane protein                     | 0.10            | 67   | 1.3E-02               | -10.5 |
| slr0335              | <i>apcE</i>  | phycobilisome LCM core-membrane linker         | 0.64            | 72   | 1.4E-02               | -11.7 |
| slr2094              | <i>glpX</i>  | fructose-1,6-/sedoheptulose-1,7-bisphosphatase | -0.13           | 80   | 1.7E-02               | -16.5 |
| sll1873              |              | unknown protein                                | <b>-0.96</b>    | 286  | 6.2E-02               | -13.6 |
| ssr2194 <sup>a</sup> |              | hypothetical protein                           | <b>-1.11</b>    | 476  | 1.1E-01               | -9.9  |
| slr1704 <sup>a</sup> |              | hypothetical protein                           | <b>-1.13</b>    | 518  | 1.2E-01               | -10.0 |
| sll0849              | <i>psbD1</i> | PSII D2 protein                                | <b>0.83</b>     | 1022 | 2.5E-01               | -8.2  |
| sll0982              |              | uncharacterized thylakoid-associated protein   | <b>1.30</b>     | 1120 | 2.7E-01               | -14.5 |
| smr0004              | <i>psaI</i>  | PSI subunit VIII ( <i>psaL-psaI</i> )          | <b>-1.01</b>    | 1533 | 3.7E-01               | -8.1  |

|                            |              | operon)                                     |              |      |         |       |
|----------------------------|--------------|---------------------------------------------|--------------|------|---------|-------|
| slr0342                    | <i>petB</i>  | Cytochrome b6                               | <b>0.80</b>  | 1759 | 4.3E-01 | -6.9  |
| sll0629                    | <i>psaK2</i> | PSI subunit X2                              | <b>-1.16</b> | 2036 | 5.1E-01 | -7.5  |
| sll0851                    | <i>psbC</i>  | PSII 44kDa reaction center protein          | <b>0.88</b>  | 2331 | 5.9E-01 | -13.6 |
| ssl2615                    | <i>atpH</i>  | ATP synthase subunit C                      | <b>0.88</b>  | 3082 | 8.0E-01 | -6.0  |
| sll0849-5'UTR              | <i>psbD1</i> | PSII D2 protein                             | <b>0.89</b>  | -    | -       | -     |
| ssr2595-5'UTR <sup>a</sup> | <i>hliB</i>  | High light inducible protein                | <b>-1.39</b> | -    | -       | -     |
| ssr0390-5'UTR              | <i>psaK1</i> | PSI subunit X1                              | <b>-1.24</b> | -    | -       | -     |
| sll1652-5'UTR <sup>a</sup> |              | hypothetical protein                        | <b>-1.05</b> | -    | -       | -     |
| ssr2153-5'UTR              |              | unknown protein                             | <b>-0.97</b> | -    | -       | -     |
| sll1873-5'UTR              |              | unknown protein                             | <b>-0.84</b> | -    | -       | -     |
| slr1655-5'UTR              | <i>psaL</i>  | PSI subunit XI ( <i>psaL-psaI</i> operon)   | <b>0.85</b>  | -    | -       | -     |
| <sup>c</sup> slr1897-5'UTR | <i>srrA</i>  | part of the introduced <i>petJ</i> promoter | <b>2.74</b>  | -    | -       | -     |
| NC-0690                    | <i>psrR1</i> | regulatory sRNA                             | <b>3.76</b>  | -    | -       | -     |
| sll0630                    |              | <i>psaK2-sll0630</i> operon                 | <b>-1.29</b> | NA   | NA      | NA    |
| ssr2595 <sup>a</sup>       | <i>hliB</i>  | High light inducible protein                | <b>-1.26</b> | NA   | NA      | NA    |
| sll1651 <sup>a</sup>       |              | hypothetical protein                        | <b>-0.99</b> | NA   | NA      | NA    |
| slr1544                    | <i>lilA</i>  | <i>lilA-hliB</i> operon                     | <b>-0.93</b> | NA   | NA      | NA    |

<sup>a</sup>Features that showed differential expression prior to PsrR1 induction by copper depletion.

<sup>b</sup>The results of microarray (MA) experiments at t=24h are shown, along with a list of the targets predicted by CopraRNA. The respective genes and 5'UTRs are indicated by their locus tags and gene names, if available. The log<sub>2</sub> fold changes are given in the column PsrR1-WT (significant changes are in bold), followed by the respective rank (R) and p-value from the comparative target prediction and the specific interaction energies in kcal mol<sup>-1</sup> for *Synechocystis* 6803 (Wright et al., 2013). "NA" indicate genes for which a prediction was not possible and dashes indicate 5'UTRs detected by microarray analysis for which a prediction was not meaningful.

<sup>c</sup>The strong signal for the *srrA*-5'UTR in *psrR1*<sup>+</sup> was an experimental artifact, since the corresponding sequence was part of the inserted fragment harboring the *PpetJ* promoter.

**Supplemental Table 2. Oligonucleotides used in this study**

| <b>Sequence (5'-3')</b>                         | <b>Name</b>            | <b>Purpose</b> |
|-------------------------------------------------|------------------------|----------------|
| AGGCTATGGAAACCCGACAG                            | qRT-syr1-fw            | qPCR           |
| CACCGAGGGCATATCTAGGA                            | qRT-syr1-rev           | qPCR           |
| AGGGAATCTGAGGAAAGTCCG                           | qRT-rnpB-fw            | qPCR           |
| GGCGGTATTTTTCTGTGGCA                            | qRT-rnpB-rev           | qPCR           |
| TAATACGACTCACTATAGGGATAAGGCTATGGAAACCC<br>GACAG | T7-PsrR1-fw-GS         | EMSA           |
| ATACCCCGGCATCACCGAGGG                           | PsrR1-rev-GS1          | EMSA           |
| TACCCCGGCATCACCGAGGGCATATCCCCAACTCAAT           | GS-PsrR1-Mu-rev        | EMSA           |
| TAATACGACTCACTATAGGGAAAGTTTTGTACGTCCCT<br>G     | GS-T7-UTR-psaL-<br>fw  | EMSA           |
| TGGTATTGAGTTCTCCTATT                            | GS-UTR-psaL-rev        | EMSA           |
| TTCAGCCATTGGTATTGAGTTC                          | GS-UTR+9-psaL-<br>rev  | EMSA           |
| GGCTTGTACAACCTTGGTTAG                           | GS-UTR+30-psaL-<br>rev | EMSA           |
| TAATACGACTCACTATAGGGAATCCTGACAATATTATTTT        | GS-psaC-5-UTR-<br>fw   | EMSA           |
| ACCAATACAGGTATCGTAAA                            | GS-psaC-+39            | EMSA           |
| TAATACGACTCACTATAGGGaatcctgacaatattatfff        | GS-psaC-5-UTR-<br>fw   | EMSA           |
| ACCAATACAGGTATCGTAAA                            | GS-psaC-+39            | EMSA           |
| TGTCACGTCCCTGACGAA                              | psaL-fw                | RNA gel blot   |
| TAATACGACTCACTATAGGGCCCCTTGGAAAGGTAACCA<br>GT   | T7-psaL-rev            | RNA gel blot   |
| GGCTATGGAAACCCGACAGAATTC                        | PsrR1-fw               | RNA gel blot   |
| TAATACGACTCACTATAGGGCCGAGGGCATATCTAGGA<br>GAAC  | T7-PsrR1-rev           | RNA gel blot   |
| TAATACGACTCACTATAGGACCCGACAAGGAATTTTCGCT<br>ACC | 23SrRNA_for            | RNA gel blot   |
| AGACGCAGTATGGGGGCTGAC                           | 23SrRNA_rev            | RNA gel blot   |
| CCACAGTGCCAGCAAGCCG                             | fabF-fw                | mutation       |
| CATAGATCTCTGTTCGGTTTTCCATAGCC                   | BglII-PsrR1-rev        | mutation       |
| CAGAGATCTATGCCCTCGGTGATGCCG                     | BglII-PsrR1-fw         | mutation       |
| GCTGGAGGTGTGGCCACGTCC                           | hoxH-rev               | mutation       |
| TTAATGCATAAAGTTTTGTACGTCCCTGACG                 | psaL_5_Nsil            | pXG10_psaL     |
| TTAGCTAGCATGCCCCACAAAAGGATCGCC                  | psaL_3_NheI            | pXG10_psaL     |
| ATAAGGCTATGGAAACCCGACAGA                        | PsrR1_5_phos           | pPsrR1         |
| GTTTTTCTAGAGCGGGATTAACAAAAAACATTCAGAC           | PsrR1_3_xbaI           | pPsrR1         |
| CggggAGATATGCCCTCGGTGATGCC                      | PsrR1_mut1_for         | pPsrR1mut1     |
| TCTccccGAACTCAATGTCAATGGAAGGTACC                | PsrR1_mut1_rev         | pPsrR1mut1     |
| GTTCTCgTAGATATGCCCTCGGTGATG                     | PsrR1_mut2_for         | pPsrR1mut2     |
| TCTAcGAGAACTCAATGTCAATGGAAGGTAC                 | PsrR1_mut2_rev         | pPsrR1mut2     |
| AATAcGAGAACTCAATACCAATGGCTGAATCTAAC             | psaL_mut_for           | pXG10_psaL*    |

|                                                 |              |                                              |
|-------------------------------------------------|--------------|----------------------------------------------|
| TTCTCGTATTAAGAATTTTCGTCAGGGACGTGA               | psaL_mut_rev | pXG10_psaL*                                  |
| TTAATGCATGCCCTGGACATCGTTAACGATC                 | cpcA_5_Nsil  | pXG30_cpcA                                   |
| TTAGCTAGCAGCTTGACGTAGACGACCGAAAG                | cpcA_3_Nhel  | pXG30_cpcA                                   |
| ATCTAcGAAAATTTTCACATTCTAACGGGAGATACCA           | cpcA_mut_for | pXG30_cpcA*                                  |
| TTTTcG TAGATATGTCAGCTTTAAGCTGGATTTTCTC          | cpcA_mut_rev | pXG30_cpcA*                                  |
| TTAATGCATTTACGATTTACCAACGATCAAGTTATTG           | chIN_5_Nsil  | pXG30_chIN                                   |
| TTAGCTAGCTTGATAAAGCCAAGATACGCAACTAATG           | chIN_3_Nhel  | pXG30_chIN                                   |
| CCTAcGAGAACCTAAACTATGACTGTTGC                   | chIN_mut_for | pXG30_chIN*                                  |
| TTCTCgTAGGTATAGTTTTTATTTTGCCTTCCTAACC           | chIN_mut_rev | pXG30_chIN*                                  |
| TTAATGCATATGTTGGGTGTTTTCTTTGGC                  | psaJ_5_Nsil  | pXG30_psaJ                                   |
| TTAGCTAGCAGTCAACAAAGCCATGATCATGACC              | psaJ_3_Nhel  | pXG30_psaJ                                   |
| ATTTTcGAGACTCAATTTATGGACGGTTTGAATCC             | psaJ_mut_for | pXG30_psaJ*                                  |
| GTCTCgAAAATTGACAAAGGTAACAAAAATAATGTCGA<br>AATTG | psaJ_mut_rev | pXG30_psaJ*                                  |
| TTAATGCATAAATATTCTCACTTTGTAAGGGATAATGGAT<br>AA  | psbB_5_Nsil  | pXG10_psbB                                   |
| TTAGCTAGCCACTAGGGCAGTGTGCATTAATG                | psbB_3_Nhel  | pXG10_psbB                                   |
| TTAATGCATATTAGAGAACTTGTTAACAAAAACGTC<br>G       | hemA_5_Nsil  | pXG10_hemA                                   |
| TTAGCTAGCCCGCAGATGGGTTAGCGCTTC                  | hemA_3_Nhel  | pXG10_hemA                                   |
| TTAATGCATGATTTTTAAAGACCCCCATTAGCGTG             | psaK1_5_Nsil | pXG10_psaK1                                  |
| TTAGCTAGCAACTTTAGGGCTCCAGGACAGG                 | psaK1_3_Nhel | pXG10_psaK1                                  |
| TAATACGACTCACTATAGGGAAAGTTTTGTCACGTCCCT<br>GAC  | psaL fw      | In vitro<br>transcription/<br>RNase E assay  |
| GTCGGAAATGGGGGTGAAA                             | psaL rev     | In vitro<br>transcription/<br>RNase E assay  |
| TAATACGACTCACTATAGGGATAAGGCTATGGAAACCC<br>GACAG | PsrR1 fw     | In vitro<br>transcription/<br>RNase E assay  |
| AAAAAAATACCCCGGCATCACCG                         | PsrR1 rev    | In vitro<br>transcription/<br>RNase E assay  |
| TAATACGACTCACTATAGGGAAGACATAAAGTCAATATC<br>ACCC | SyR12 fw     | In vitro<br>transcription/<br>RNase E assay  |
| AAAAAGAAAGCCGCCACTG                             | SyR12 rev    | In vitro<br>transcription/<br>RNase E assay  |
| CAGGGACGTGACAAACTTT                             | 5'probe psaL | RNA gel blot<br>oligo probe<br>RNase E assay |

**Supplemental Table 3. Plasmids used in this study**

| Plasmid name | Comment                                                                                                                                                             | Origin, marker           | Reference  |
|--------------|---------------------------------------------------------------------------------------------------------------------------------------------------------------------|--------------------------|------------|
| control      | Control plasmid, expresses a ~50 nt nonsense transcript.                                                                                                            | ColE1, Amp <sup>R</sup>  | [5]        |
| pXG10_psaL   | sfGFP reporter plasmid. Carries the <i>psaL</i> 5'UTR and the first 57nt of the coding sequence                                                                     | pSC101*, Cm <sup>R</sup> | This study |
| pPsrR1       | PsrR1 expression plasmid                                                                                                                                            | ColE1, Amp <sup>R</sup>  | This study |
| pPsrR1mut1   | Derivate of pPsrR1                                                                                                                                                  | pSC101*, Cm <sup>R</sup> | This study |
| pPsrR1mut2   | Derivate of pPsrR1                                                                                                                                                  | pSC101*, Cm <sup>R</sup> | This study |
| pXG10_psaL*  | Derivate of pXG10_psaL                                                                                                                                              | pSC101*, Cm <sup>R</sup> | This study |
| pXG30_cpcA   | sfGFP reporter plasmid. Carries the last 108nt of <i>cpcB</i> the <i>cpcB-cpcA</i> intergenic region and the first 102nt of the <i>cpcA</i> coding sequence         | pSC101*, Cm <sup>R</sup> | This study |
| pXG30_cpcA*  | Derivate of pXG30_cpcA                                                                                                                                              | pSC101*, Cm <sup>R</sup> | This study |
| pXG30_chlN   | sfGFP reporter plasmid. Carries the last 102 nt of <i>ssr1251</i> the <i>ssr1251-chlN</i> intergenic region and the first 102 nt of the <i>chlN</i> coding sequence | pSC101*, Cm <sup>R</sup> | This study |
| pXG30_chlN*  | Derivate of pXG30_chlN                                                                                                                                              | pSC101*, Cm <sup>R</sup> | This study |
| pXG30_psaJ   | sfGFP reporter plasmid. Carries the last 99 nt of <i>psaF</i> the <i>psaF-psaJ</i> intergenic region and the first 60 nt of the <i>psaJ</i> coding sequence         | pSC101*, Cm <sup>R</sup> | This study |
| pXG30_psaJ*  | Derivate of pXG30_psaJ                                                                                                                                              | pSC101*, Cm <sup>R</sup> | This study |
| pXG10_psbB   | sfGFP reporter plasmid. Carries the <i>psbB</i> 5'UTR and the first 90nt of the coding sequence                                                                     | pSC101*, Cm <sup>R</sup> | This study |
| pXG10_hemA   | sfGFP reporter plasmid. Carries the <i>hemA</i> 5'UTR and the first 108 nt of the coding sequence                                                                   | pSC101*, Cm <sup>R</sup> | This study |
| pXG10_psaK1  | sfGFP reporter plasmid. Carries the <i>psaK1</i> 5'UTR and the first 60 nt of the coding sequence                                                                   | pSC101*, Cm <sup>R</sup> | This study |

## Supplemental Methods

**Reverse transcription and quantitative real-time PCR experiments.** RNA extracted from *psrR1*<sup>+</sup> the isogenic wild-type control strains before and after removal of copper was reverse-transcribed by using the Superscript III kit (Fermentas). Reverse transcription was performed according to the manufacturer's protocol. *PsrR1* was reverse transcribed using the specific primer qRT-syr1-rev (Table S1). In parallel non-template controls were run for each RNA sample. Quantitative PCR was carried out in duplicates with a QuantiFast SYBR Green PCR Kit (Qiagen) according to the two-step cycling protocol in the manufacturer's instructions using a 7500 Fast System (Applied Biosystems, Foster City, CA, USA). In each reaction volume of 10 $\mu$ l 1 $\mu$ M of primer (Table S1) and 1ng of the synthesized cDNA was mixed. Data were analyzed with the 7500 Fast System SDS software (Applied Biosystems), threshold and baseline values were set automatically by the software. Relative transcript quantities were calculated by the ddCT method [2]. Normalized expression values were calculated relative to the endogenic control gene *mnpB*.



## Supplemental References

- [1] Mitschke J, *et al.* (2011) An experimentally anchored map of transcriptional start sites in the model cyanobacterium *Synechocystis* sp. PCC6803. *Proc Natl Acad Sci U S A* **108**:2124-2129.
- [2] Livak KJ, Schmittgen TD (2001) Analysis of relative gene expression data using real-time quantitative PCR and the  $2^{-\Delta\Delta C_T}$  Method. *Methods* **25**:402-408.
- [3] Rippka R, Deruelles J, Waterbury JB, Herdman M, Stanier RY (1979) Generic assignments, strain histories and properties of pure cultures of cyanobacteria. *J Gen Microbiol* **111**:1–61.
- [4] Tamura K, Peterson D, Peterson N, Stecher G, Nei M, Kumar S. (2011) MEGA5: molecular evolutionary genetics analysis using maximum likelihood, evolutionary distance, and maximum parsimony methods. *Mol Biol Evol* **28**:2731-2739.
- [5] Wright PR, Richter AS, Papenfort K, Mann M, Vogel J, Hess WR, Backofen R, Georg, J (2013). Comparative genomics boosts target prediction for bacterial small RNAs. *Proc Natl Acad Sci USA* **110**: E3487-3496.
- [6] Huang DW, Sherman, BT, Lempicki RA (2009). Systematic and integrative analysis of large gene lists using DAVID bioinformatics resources. *Nat Protoc* **4**: 44-57.
- [7] Kopf M, Klähn S, Scholz I, Matthiessen J, Hess WR, Voß B (2014) Comparative analysis of the primary transcriptome of *Synechocystis* sp. PCC6803. *DNA Research*, doi:10.1093/dnares/dsu018 [Epub ahead of print].
